# Supplementary figures and images for: Protocol for generating high-fidelity proteomic profiles using DROPPS
Source: PubMed Central journal article supplement — STAR Protoc. 2024 Oct 18;5(4):103397. doi: 10.1016/j.xpro.2024.103397 (PMC11513556; doi:10.1016/j.xpro.2024.103397), 2024-10-18

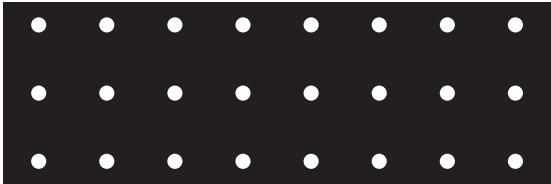

Supplement: mmc1.pdf [file mmc1.pdf]
